# Supplementary material for: Modeling tsunami and seismic waveforms from regional earthquakes to inform system design and data integration for the Tamtam SMART subsea cable
Source: Copernicus journal article supplement (doi:10.5194/egusphere-2025-5825), 2025-12-11
Supplement: Supplementary file [file egusphere-2025-5825-RC2-supplement.pdf]

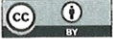

1 **Modeling tsunami and seismic waveforms from regional earthquakes to**  
2 **inform system design and data integration for the Tamtam SMART**  
3 **subsea cable**

4 Kwok Fai Cheung<sup>1</sup>, Yoshiki Yamazaki<sup>1</sup>, Thorne Lay<sup>2</sup>, Matthew J. Fouch<sup>3</sup>, John Jr. Niroa<sup>4</sup>,  
5 and Bruce M. Howe<sup>1</sup>

6 <sup>1</sup>Department of Ocean and Resources Engineering, University of Hawaii at Manoa, Honolulu,  
7 Hawaii, 96822, USA

8 <sup>2</sup>Department of Earth and Planetary Sciences, University of California Santa Cruz, Santa Cruz,  
9 California, 95064, USA

10 <sup>3</sup>Subsea Data Systems, Washington DC, USA

11 <sup>4</sup>Vanuatu Meteorology and Geo-hazards Department, Port Vila, Vanuatu

Modelling

12 *Correspondence to:* Kwok Fai Cheung (cheung@hawaii.edu)

13 **Abstract.** Science Monitoring And Reliable Telecommunications (SMART) subsea cables utilize  
14 sensors integrated within repeaters to record temperature, ~~acceleration, and~~ *and seismic data* pressure on the  
15 seafloor. The planned Tamtam SMART cable will connect Vanuatu and New Caledonia across a  
16 major subduction zone. Modeling recent  $M_w$  7.7 to 8.0 earthquakes and maximum considered  $M_w$   
17 8.33 to 8.8 scenarios *provides* a range of seismic waveforms with realistic relative timing and long-  
18 period ground displacements at the sensor locations, *yields* as well as coseismic seafloor uplift and  
19 subsidence at the sources used for tsunami excitation. A nonhydrostatic model describes tsunami  
20 generation, propagation, and scattering in the southwest Pacific. Spectral analysis of the computed  
21 tsunami waves shows multi-scale oscillations along the Vanuatu trench with periods from a few  
22 minutes to over an hour. The cable sensor locations are outside energetic antinodes of oscillation  
23 modes, and the modeled tsunami amplitude is representative of the seismic source with minor  
24 interference from land masses. The suite of synthetic seismic and tsunami waveforms informs *the*  
25 implementation of the sensor system for regional hazard monitoring. The Tamtam SMART cable,  
26 deployed in a very active tectonic environment with limited on-land instrumentation, will augment  
27 rapid earthquake and tsunami warning as well as source quantification.

28 **1. Introduction**

29 The last decade has seen increased interest in leveraging subsea telecommunication cables as a  
30 cost-effective means to monitor vast expanses of the ocean. There are currently 1.5 million  
31 kilometers of subsea cables in operation around the world. When existing cables are replaced or

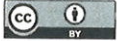

32 new routes are planned, sensors can be installed at repeaters or in separate modules to provide  
33 dense measurements of temperature, ~~acceleration, and~~ <sup>and seismic data</sup> pressure for oceanographic and climate  
34 research at a modest incremental cost (Howe et al., 2019). The resulting Science Monitoring And  
35 Reliable Telecommunications (SMART) subsea cables can also provide real-time data for  
36 earthquake and tsunami early warning, and that has provided motivation for a number of on-going  
37 projects, such as the InSEA wet demonstration project off Sicily, Italy; and the Atlantic CAM ring  
38 system connecting Lisbon, Azores, and Madeira in Portugal (Howe et al., 2022), ~~and the Atlantic CAM ring~~

39 Planning for the Tamtam SMART subsea cable between Vanuatu and New Caledonia in the  
40 Southwest Pacific is currently underway. The system will stretch across the Vanuatu subduction  
41 zone, which is very active and geologically young, with frequent tsunamigenic earthquakes (Roger  
42 and Pelletier, 2024). The planned cable route extends from Port Vila, the capital of Vanuatu, <sup>on to</sup>  
43 Efate Island, along the archipelago to the south, before crossing the trench to reach an existing  
44 landing station on Lifou Island with connectivity to the rest of New Caledonia (Fig. 1). There are  
45 four sensor modules 50~90 km apart along the 450 km cable. Three sensor modules are planned  
46 for the upper margin slope along the shelf edge and one at the trench to provide real-time  
47 earthquake and tsunami monitoring capability near populated areas. This project is situated in a  
48 region with existing seismic and sea level networks that can provide information for examination  
49 of data quality and interoperability. As shown in Fig. 1a, the New Zealand DART (Detection and  
50 Reporting of Tsunami) network has some coverage of tsunami waves in the Southwest Pacific  
51 with stations to the west and south of the Vanuatu islands (Fry et al., 2020). Global seismic network  
52 stations are rather sparsely distributed in the Southwest Pacific but are supplemented by more than  
53 50 stations of the Oceania Regional Seismic Network (ORSNET) operated by South Pacific  
54 countries (UNESCO-IOC, 2025).

55 Tsunamis in the region have been generated predominantly by earthquakes with volcanic and  
56 non-seismic sources representing less than 5% of documented events (Roger and Pelletier, 2024).  
57 Fig. 1b shows the locations of selected tsunamigenic earthquakes with regional implications. The  
58 northern Vanuatu subduction zone has produced several large earthquakes in the past century. One  
59 of the largest is the 6 February 2013 *M<sub>w</sub>* 8.0 Santa Cruz Islands thrust faulting with shallow  
60 eastward dip that generated a destructive tsunami impacting local communities (e.g., Lay et al.,  
61 2013; Cleveland et al., 2014). Across the d'Entrecasteaux Ridge, the southern Vanuatu subduction  
62 zone is known for strong and long-duration aftershock sequences (Ye et al., 2021), accompanying

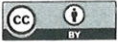

63 major plate boundary and outer rise earthquakes (Roger et al., 2021). The largest, 1875 thrust-  
64 faulting earthquake with <sup>an</sup> estimated  $M_w$  8.1-8.2 produced sediment deposits reaching 10 m  
65 elevation on the northeastern coast of Lifou Island, New Caledonia (Paris et al., 2023), while an  
66  $M_w$  7.7 normal faulting event in May 1995 along the Loyalty ridge generated a tsunami with 8 m  
67 runup on Aneityum Island, Vanuatu (Roger and Pelletier, 2024).

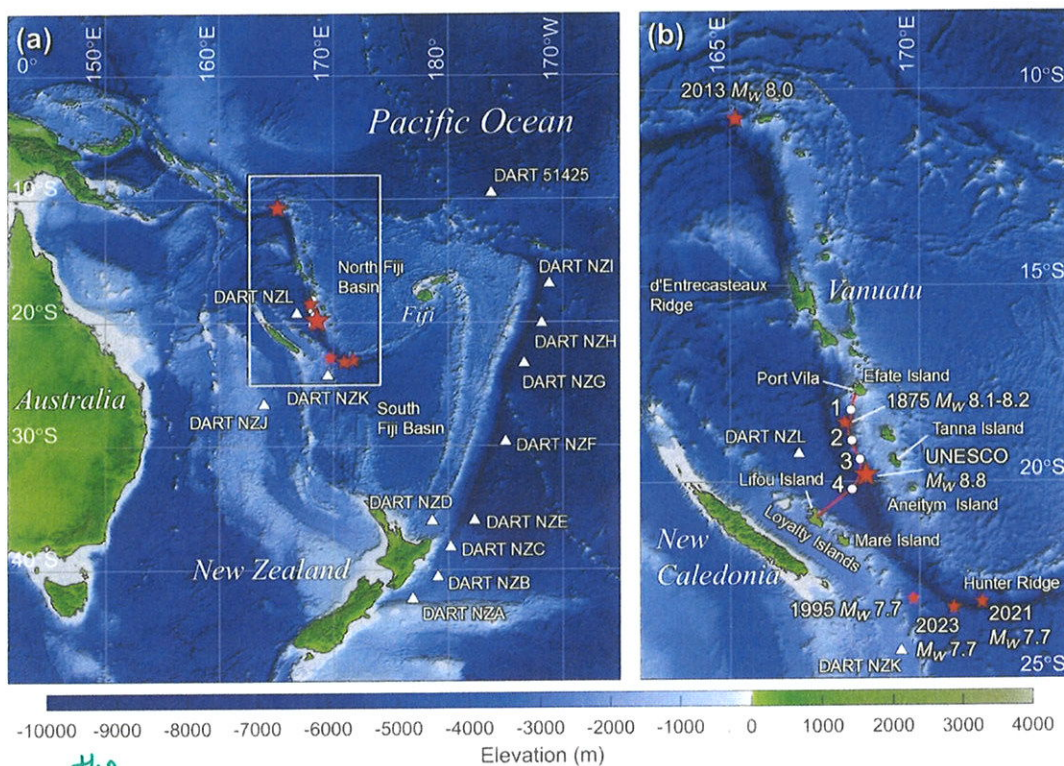

68 <sup>the</sup> **Figure 1.** Location map and two levels of nested computational grids. (a) Level-1 Southwest  
69 Pacific. White rectangle indicates the level-2 grid coverage. (b) Level-2 Vanuatu subduction zone.  
70 The magenta line and white circles denote planned SMART cable and sensor locations. White  
71 triangles denote DART locations. Smaller red stars indicate epicenters of large historical and  
72 recent tsunamigenic earthquakes and the large red star indicate <sup>the</sup> the maximum earthquake in the  
73 Southern Vanuatu Subduction Zone from UNESCO-IOC (2025).  
74

75 The southernmost Vanuatu Trench curves eastward along the Hunter Ridge. The two largest  
76  $M_w$  7.7 earthquakes in the past quarter-century occurred on opposing sides of the Southern  
77 Vanuatu Trench in 2021 and 2023. The resulting tsunamis of similar wave amplitude have distinct  
78 near-field patterns associated with the source location in relation to nearby seamounts and islands,  
79 but similar far-field patterns due to standing waves amongst the many seamounts and islands in

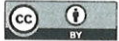

80 the southwest Pacific (Robert et al., 2025). This event pair within 2 years is analogous to the 2013  
81 Santa Cruz megathrust  $M_W$  8.0 and 2015 normal faulting  $M_W$  7.0 earthquakes on opposing sides of  
82 the trench in the northern Vanuatu subduction zone (Heidarzadeh et al., 2016). These recent  
83 earthquakes at the northern and southern termini of the subduction zone produced moderate  
84 tsunamis affecting Vanuatu and New Caledonia. Larger historical earthquakes between the two  
85 island chains, such as the 1875  $M_W$  8.1-8.2 and the 1995  $M_W$  7.7, indicate greater tsunami risk to  
86 population centers. Port Vila was extensively damaged by ground shaking from a nearby 54 km  
87 deep  $M_W$  7.3 intraslab event in December 2024, accompanied by a minor tsunami of 0.25 m  
88 amplitude.

89 Governments, scientists, and stakeholders are motivated to understand earthquake and tsunami  
90 hazards to support comprehensive risk management strategies among nations in the Southwest  
91 Pacific. UNESCO-IOC (2025) proposed maximum earthquake scenarios inferred probabilistically  
92 from the estimated degree of segmentation, <sup>the</sup> width of strain accumulation zones, <sup>and</sup> fault locking  
93 relative to plate convergence, and <sup>the</sup> material properties of rocks along the Vanuatu subduction zone.  
94 Comparable maximum earthquake estimates were made for the northern, central, southern, and  
95 Matthew-Hunter Islands regions along the arc. Full rupture of the southern 500-km long segment,  
96 where the proposed Tamtam SMART cable is located, can produce up to  $M_W$  8.8 involving five  
97  $M_W$  8.33 subevents. These scenarios along with the well-resolved 2013  $M_W$  8.0 Santa Cruz Islands  
98 earthquake to the north and the 2021 and 2023  $M_W$  7.7 earthquakes southeast of the Loyalty Islands  
99 provide a range of large events in the region that the proposed SMART subsea cables might record  
100 signals for (Fig. 1b). Modeling the corresponding earthquake and tsunami signals can inform  
101 system and sensor design, aid data integration into regional networks, and identify implications  
102 for emergency management in the cable system planning stage.

## 103 **2. Tsunami and seismic wave modeling**

104 Finite fault-slip models have been an effective tool to describe earthquake rupture and seafloor  
105 deformation time histories for non-hydrostatic modeling of tsunami generation (Yamazaki et al.,  
106 2023). The methodology has evolved over the last half-century from simple point source models  
107 in <sup>a</sup> homogenous, <sup>e</sup> elastic half-space to space-time distributions of slip over a finite-fault surface or  
108 network of surfaces, constrained by combinations of seismic, geodetic, and tsunami observations.

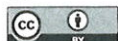

109 Such models are now routinely obtained for large earthquakes, and can be used in quantitative  
110 forward modeling of long-period ground motions at any location of interest.

## 111 2.1 Rupture models

112 Finite fault-slip models describe rupture kinematics through grids of subfaults, each of which  
113 has uniform slip and a parameterized source time function. The collective motion accounts for the  
114 spatial-temporal seismic moment and energy release during the rupture. In our present formulation,  
115 the seafloor vertical displacement is computed from the half-space solution of Okada (1985) and  
116 adjusted for horizontal translation of the local slope according to Tanioka and Satake (1996). Fig.  
117 2 shows the finite fault-slip models and co-seismic vertical seafloor displacement for the 2013  $M_W$   
118 8.0 Santa Cruz Islands earthquake (Lay et al., 2013), the 2021 and 2023  $M_W$  7.7 earthquakes  
119 southeast of the Loyalty Islands (Robert et al., 2025), and the  $M_W$  8.8 maximum considered  
120 earthquake scenario for the southern Vanuatu subduction zone (UNESCO-IOC, 2025). The three  
121 historical events have finer subfaults that provide fairly detailed slip distributions and time  
122 histories inferred from global seismic and regional tsunami wave recordings, valid for seismic  
123 periods longer than  $\sim 5$ -10 s. The maximum earthquake scenario has larger subfaults with  
124 prescribed uniform slip and rise time, and is only valid for seismic periods longer than  $\sim 15$  s.

125 The 2013  $M_W$  8.0 Santa Cruz Islands earthquake has shallow eastward dip in two large slip  
126 patches and a southeastward rupture expansion at  $\sim 1.5$  km/s. The megathrust rupture has up to  
127 12.7 m slip producing 3.3 m near-trench uplift and minor arc subsidence (Lay et al., 2013). The  
128 2021  $M_W$  7.7 thrust-faulting earthquake occurred at the plate boundary interface near the southern  
129 hook of the Vanuatu subduction zone. The peak slip reaches 7.5 m over a 55 s rupture time and  
130 produces 1.3 m uplift and minor subsidence on the lower and upper margin slope (Robert et al.,  
131 2025). The nearby 2023  $M_W$  7.7 earthquake with a similar east-west extent involved a normal fault  
132 in the outer rise. The peak slip reaches 5.2 m over a 45 s rupture time with relatively small uplift  
133 but large subsidence of 2.4 m near the trench (Robert et al., 2025). The finite fault models for the  
134 three historical events, which have been determined from joint seismic and tsunami modeling, are  
135 implemented to provide time histories of seafloor deformation for tsunami excitation directly.  
136 Short-period features of the sources and details of the propagation structures are not known, so we  
137 restrict our seismic modeling near the Tamtam sites to ground displacements with long-periods  
138 consistent with simplified, point-source model representations in a one-dimensional velocity  
139 structure.

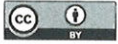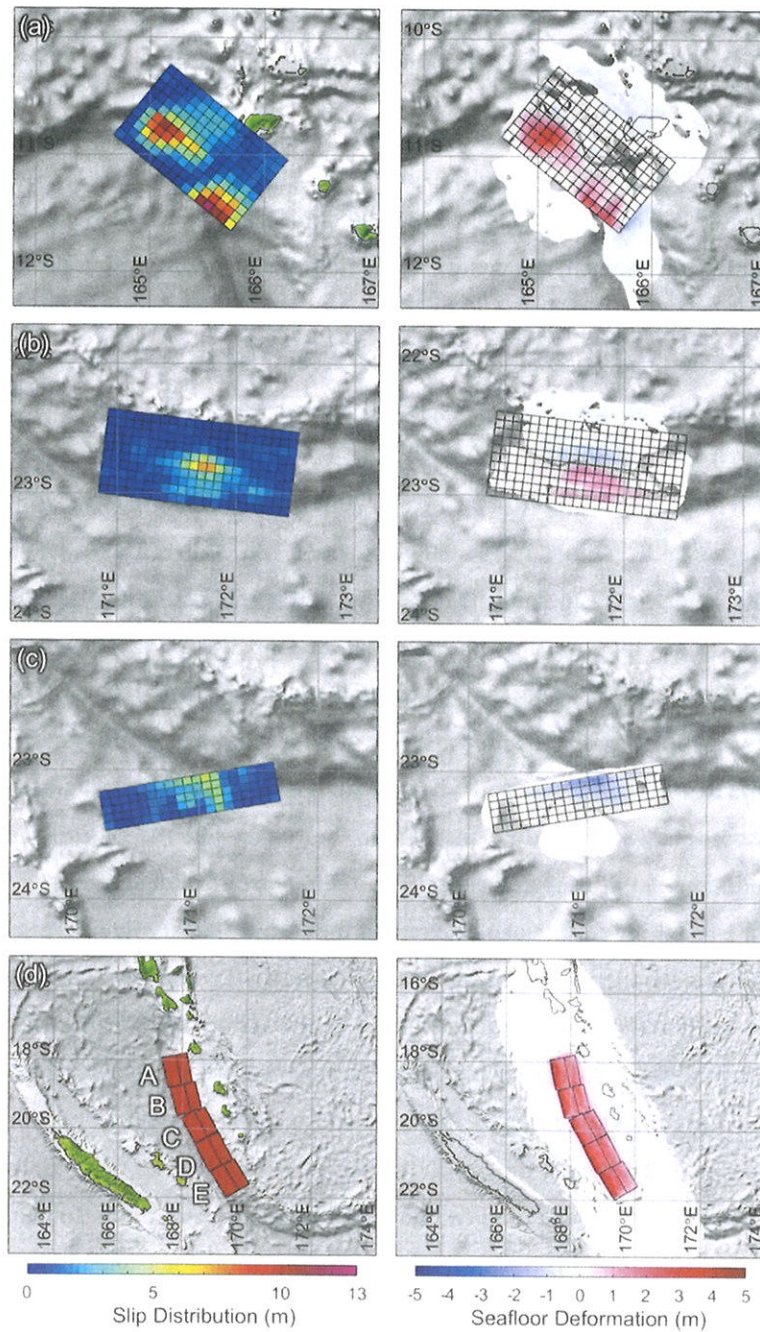

140

141 **Figure 2.** Slip distribution and seafloor deformation. (a) The 2013  $M_w$  8.0 Santa Cruz Islands  
142 earthquake. (b) The 2021  $M_w$  7.7 earthquake southeast of the Loyalty Islands. (c) The 2023  $M_w$   
143 7.7 earthquake southeast of the Loyalty Islands. (d) UNESCO  $M_w$  8.33 A, B, C, D, and E sub-  
144 events which combine to give the  $M_w$  8.8 earthquake scenario.

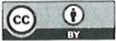

145 The rupture of the maximum considered earthquake scenario extends 500 km along the  
146 southern Vanuatu subduction zone and 100 km downdip from the trench (UNESCO-IOC, 2025).  
147 The  $M_W$  8.8 earthquake scenario corresponds to the 90th percentile in the posterior maximum  
148 moment distribution of the probabilistic tsunami hazard assessment compiled by Davis and Griffin  
149 (2018). The model has uniform slip of 10 m and a rigidity of 40 GPa. The slip is within the range  
150 of the three recent major events from 5.2 to 12.7 m, but is implemented over a much larger area  
151 for the maximum scenario. The uplift varies gradually from 1.1 m at the shelf edge to 4.6 m near  
152 the trench and the subsidence is relatively small due to the uniform slip across the full segment.  
153 The five  $M_W$  8.33 subevents on 100 km wide and 100 km long ruptures can be considered  
154 separately as local failures along the segment to augment the parameter space. Each subevent is  
155 comparable to the largest observed, 1875  $M_W$  8.1-8.2 earthquake in the region (Ioualalen et al.,  
156 2017). For <sup>the</sup> modeling of tsunami excitation, the rupture is assumed to start simultaneously across  
157 the entire fault and the dislocation follows a linear ramp function over a 30 sec rise time to reach  
158 the specified total slip. There is no known constraint on rupture heterogeneity or directivity.  
159 Simultaneous rupture of the five subevents is computed for the  $M_W$  8.8 earthquake scenario to  
160 direct tsunami waves normal to the arc and to provide a conservative estimate of the resulting  
161 impact <sup>on</sup> to local communities on either side.

## 162 2.2 Tsunami modeling

163 The tsunami code NEOWAVE augments the commonly used nonlinear shallow-water  
164 equations with depth-averaged vertical velocity and non-hydrostatic pressure (Yamazaki et al.,  
165 2009, 2011). The resulting quasi three-dimensional flow can describe tsunami generation from  
166 time-dependent seafloor deformation, frequency dispersion during trans-oceanic propagation, and  
167 wavenumber-dependent shoaling on seafloor slopes. The vertical inertia in the nonhydrostatic  
168 formulation facilitates <sup>an</sup> accurate description of sea-surface oscillation at tsunami sources as well as  
169 runup and drawdown on steep topography (Bai et al., 2023). A shock-capturing scheme  
170 approximates breaking waves as bores or hydraulic jumps to ensure conservation of mass and  
171 momentum while enabling energy dissipation without predefined empirical mechanisms. These  
172 model capabilities have been benchmarked against mathematical and numerical models as well as  
173 laboratory and field measurements (Yamazaki et al., 2023).

174 The <sup>modeling</sup> involves two levels of two-way nested computational grids, telescoping from the  
175 Southwest Pacific to the tsunami source region along the Vanuatu subduction zone. The digital

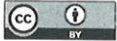

176 elevation model is derived from GEBCO14 at 30 arcsec (~0.9 km). The level-1 grid covers the  
177 Southwest Pacific to capture large-scale standing waves generated by reflection from land masses  
178 as well as trapping along island chains (Fig. 1a). The 2-arcmin (~3.7 km) resolution leads to  
179 optimal model dispersion for transoceanic tsunami propagation (Li and Cheung, 2019). As shown  
180 in Fig. 1b, the level-2 grid extends along the Vanuatu subduction zone and resolves the margin  
181 and tsunami sources at 30 arcsec (~0.9 km). The co-seismic seafloor vertical displacement defines  
182 the tsunami excitation and updates the digital elevation model. Inundation is not modeled at this  
183 resolution and the subgrid roughness of the seafloor is described by a Manning's number of 0.025.  
184 The local mean-sea level is the datum of the digital elevation model as well as the sea surface  
185 elevation.

### 186 **2.3 Seismic wave modeling**

187 Dynamic ground motions are computed at a target location (18.782°S, 168.2°E), which is  
188 planned for sensor 2 on the Tamtam SMART cable (Fig. 1b). The predicted ground motions vary  
189 slowly in space and thus remain very similar at the four sensor locations. The purpose here is to  
190 inform sensor design and data integration by estimating approximate timing, duration, and levels  
191 of long period ground displacement produced near the site for <sup>a</sup>large recent plate boundary and  
192 plausible maximum regional ruptures along the Vanuatu subduction zone. The precise details of  
193 the historical, finite-fault ruptures are not important here and are unknown for <sup>the</sup>maximum rupture  
194 scenarios. Numerical modeling is thus simplified to <sup>the</sup>computation of <sup>an</sup>equivalent point-source  
195 representations of the three large recent events and the subevents of the maximum rupture scenario  
196 along with their composite.

197 Synthetic seismograms are computed using a standard one-dimensional Earth Model, which is  
198 an anisotropic version of the Preliminary Reference Earth Model (PREM; Dziewonski and  
199 Anderson, 1981). The ground displacements up to 2 s period are computed using the SYNGINE  
200 (synthetic engine) seismic wave simulator (<https://ds.iris.edu/ds/products/ondemandsynthetics/>),  
201 for point-source moment tensor representations of the earthquake models. While short-period  
202 seismic waves and associated ground velocities and accelerations will be affected by the actual  
203 three-dimensional structure along the paths from sources to the observing location, the details are  
204 not known for this particular assessment of the ground shaking levels. Our focus is on the relative  
205 timing, duration, and amplitude of long period ground displacements produced by each source near  
206 the Tamtam site.

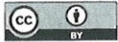

### 207 3. Model results

208 The modeling work provides tsunami and seismic waves generated by the three recent major  
209 earthquakes and the UNESCO maximum scenario, including its five subevents along the Vanuatu  
210 subduction zone. The tsunami modeling covers an elapsed time of 10 hours to capture <sup>the</sup> shelf  
211 oscillations along the archipelago as well as standing waves within the north and south Fiji Basins.  
212 The results include regional tsunami amplitude maps, energetic oscillation modes along the  
213 margin, and synthetic tsunami and seismic waveforms at the representative, sensor 2 location of  
214 the planned SMART subsea cable.

#### 215 3.1 Recent major events

216 The 2013  $M_W$  8.0 Santa Cruz Islands earthquake and the 2021 and 2023  $M_W$  7.7 earthquakes  
217 southeast of the Loyalty Islands are representative of major events from the northern and southern  
218 termini of the Vanuatu subduction zone. Fig. 3 shows <sup>the</sup> regional distributions of the maximum sea  
219 surface excursion, which includes crest and trough amplitude to better represent the energy pattern,  
220 especially for the 2023 normal-fault event (Robert et al., 2025). The two near-trench uplift patches  
221 from the 2013 thrust faulting <sup>s</sup> provide the primary source of the tsunami with minor contributions  
222 from subsidence on the upper margin slope (Fig. 2a). Constructive interference of the radiated  
223 waves from the two uplift patches defines <sup>t</sup> the main lobes in the northeast and southwest directions  
224 away from Vanuatu (Fig. 3a). Refraction of the radiated waves over the margin slope and outer  
225 rise produces notable side lobes <sup>e</sup> to the east and south toward the Santa Cruz Islands and the main  
226 island of New Caledonia, respectively. The SMART cable site located southeast of the source on  
227 the margin slope experiences <sup>s</sup> only minor wave action albeit with amplification over adjacent insular  
228 shelves along the Vanuatu Islands.

229 The 2021 and 2023  $M_W$  7.7 earthquakes on opposing sides of the southern Vanuatu Trench  
230 have similar east-west rupture extents <sup>s</sup>, but produce tsunamis with a leading crest and a leading  
231 trough associated with the thrust and normal faulting mechanisms, respectively (Robert et al.,  
232 2025). The distinct northern energy lobes result from the source location relative to seamounts and  
233 islands immediately north <sup>s</sup> along the Hunter Ridge. In comparison, the southern lobes are normal  
234 to the strike of the respective earthquakes due to <sup>the</sup> lack of major bathymetric features south of the  
235 source. The 2023 earthquake has narrower seafloor deformation beneath deeper water resulting in  
236 shorter period tsunami waves that are focused more effectively along seamounts and island chains  
237 to produce a more elaborate wave pattern. Both tsunamis generated by earthquakes in the southern

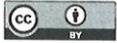

238 arc of the subduction zone direct the primary energy to the north and south, with minimal threat to  
239 the main island of New Caledonia. Refraction of the radiated waves over the margin slope  
240 generates side lobes toward the Vanuatu Islands with moderate wave action associated with <sup>the</sup> shelf  
241 oscillations for both events.

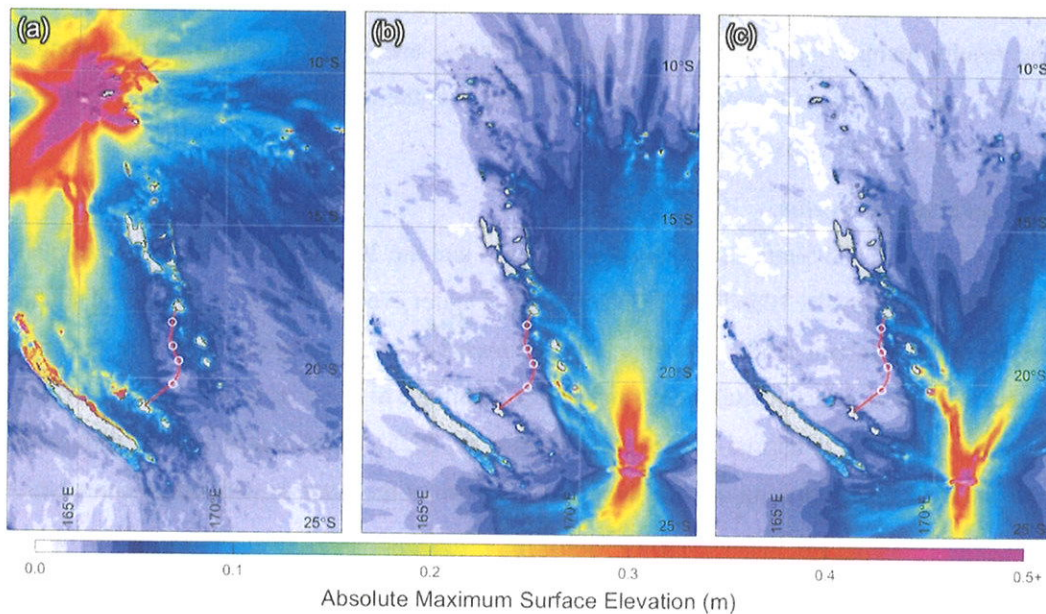

242 **Figure 3.** Computed absolute maximum surface elevation of tsunamis generated by recent major  
243 earthquakes. (a) The 2013  $M_w$  8.0 Santa Cruz Islands earthquake. (b) The 2021  $M_w$  7.7 Southeast  
244 of Loyalty Islands earthquake. (c) The 2023  $M_w$  7.7 Southeast of Loyalty Islands earthquake. Red  
245 line and circles denote planned SMART cable and sensor locations.

247 The four planned sensor modules are located off the insular shelves (Fig. 1b) and outside zones  
248 of tsunami amplification for all three recent events (Fig. 3). The computed sea-surface elevations  
249 at the sensors are an order of magnitude smaller compared to the adjacent shallow shelves. The  
250 bathymetry-driven oscillation is illustrated by spectral analysis of the computed 2013 tsunami that  
251 converts the surface elevation time history to amplitude as a function of period (Munger and  
252 Cheung, 2008). Fig. 4 shows selected oscillation modes with well-defined nodal lines, where the  
253 amplitude is zero, and the phase varies by  $180^\circ$  across, indicative of resonance. The 7 to 40-min  
254 modes indicate distinct standing edge waves along the New Caledonia ridge, the Loyalty Island  
255 ridge, and the Santa Cruz and Vanuatu Islands. The standing waves along the geographically  
256 smaller, Loyalty Island ridge vanish for longer-period oscillations at margin and basin scales. Since  
257 the oscillation modes are independent of tsunami sources (e.g., Cheung et al., 2013; Aranguiz et

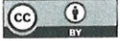

258 al., 2019), the SMART sensors located mostly outside energetic antinodes can record direct  
259 tsunami signals with minor influences from adjacent landmasses.

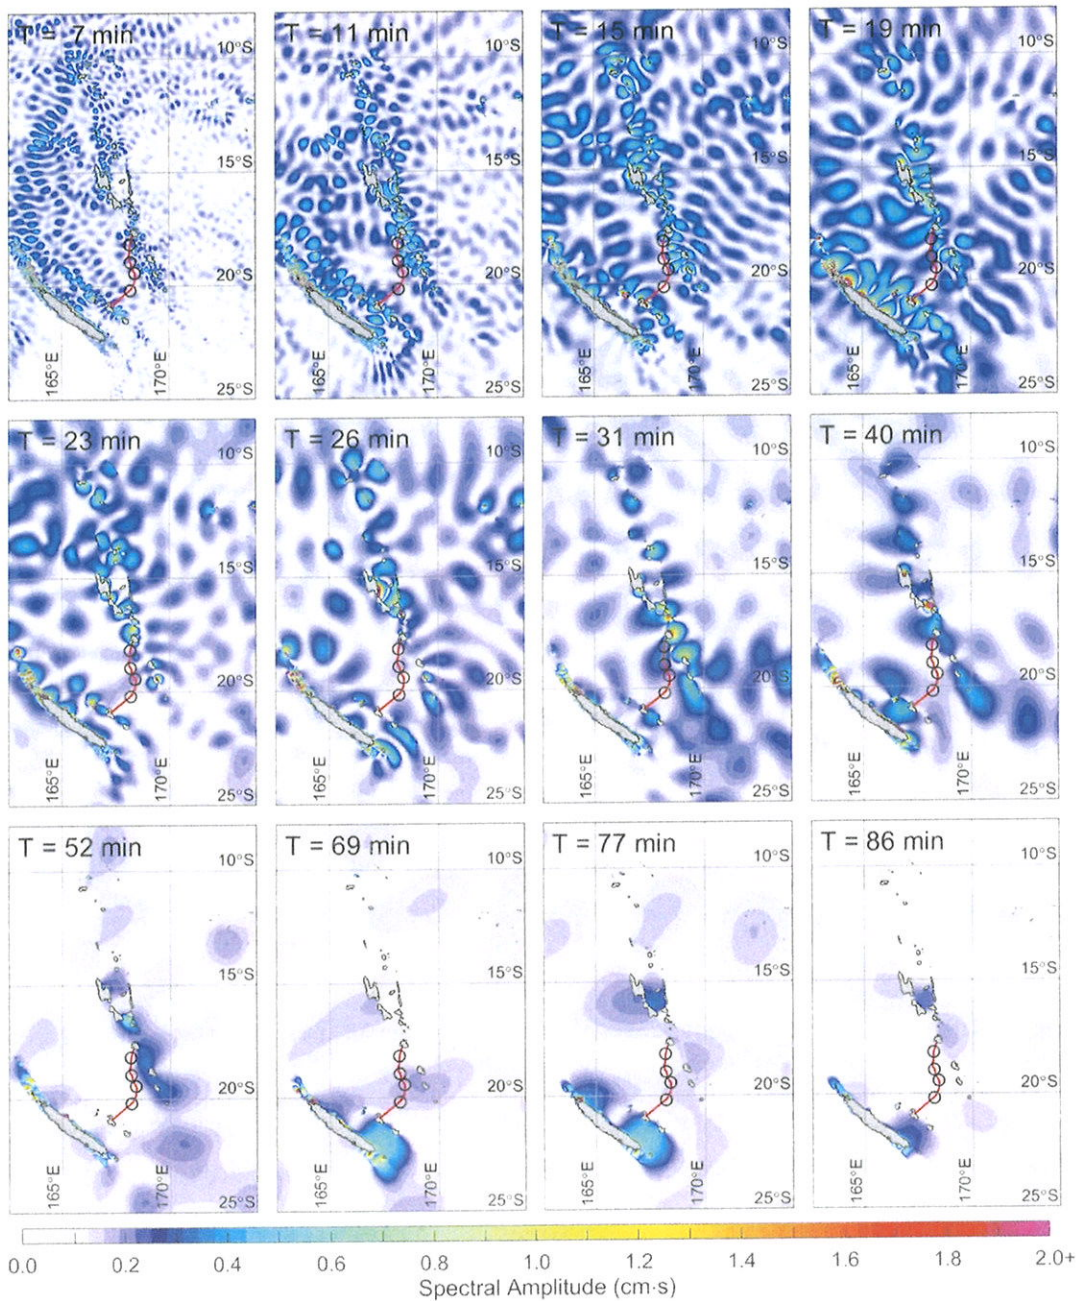

260  
261 **Figure 4.** Oscillation modes derived from the 2013  $M_W$  8.0 Santa Cruz tsunami. Red line and  
262 circles denote planned SMART cable and sensor locations.

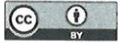

263 Fig. 5 shows the computed waveforms and spectra from the 2013, 2021, and 2023 tsunamis at  
264 sensor 2. All three tsunamis arrive in  $\sim 1$  hr after earthquake initiation. The 2013 and 2021 thrust  
265 faulting events produce initial arrivals in the form of a crest, while the 2023 normal faulting results  
266 in a leading trough. The initial arrivals directly from the source via the Vanuatu trench are weak  
267 for the 2021 and 2023 events southwest of the Loyalty Islands, because the energy is diverted into  
268 the North Fiji Basin through refraction-diffraction across the Hunter Ridge (Robert et al., 2025).  
269 The subsequent waveforms are primarily leaked energy from nearby shelf oscillations, where the  
270 amplitude is an order of magnitude larger (Fig. 3). The 2013 tsunami from the San Cruz Islands  
271 has more energetic long period components due to the sensor's location at  $90^\circ$  azimuth from the  
272 main lobe. Despite the varying waveforms in the three events, their spectra show similar sets of  
273 harmonics with periods in 10–40 and 50–100 min associated with the island and basin-scale  
274 oscillations as shown in Fig 4.

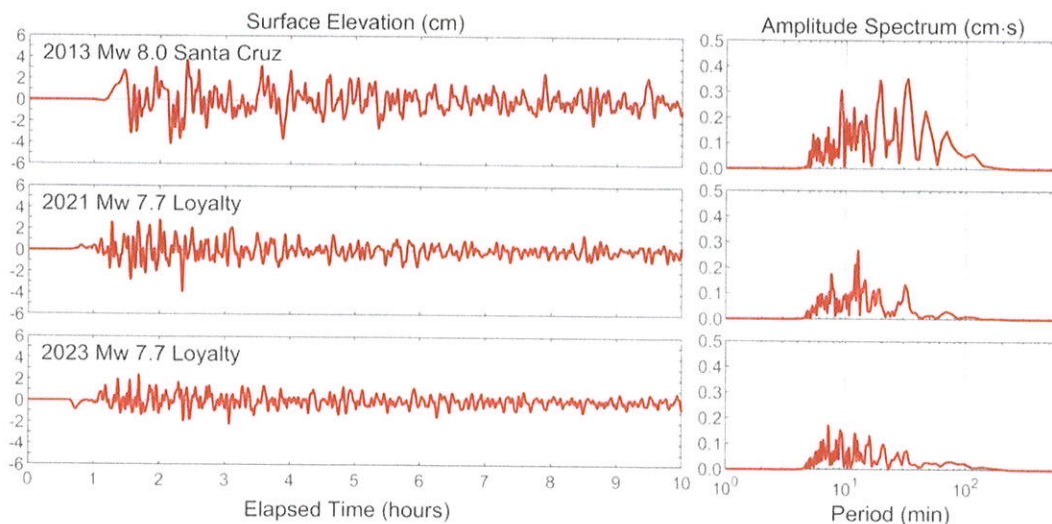

275  
276 **Figure 5.** Synthetic tsunami time series and spectra at the target location of SMART sensor 2 from  
277 the three recent major earthquakes in the Vanuatu subduction zone shown in Fig. 2a-c.

278 The vertical and transverse (horizontal perpendicular to the great circle path at the receiver)  
279 ground displacements at sensor 2 of the SMART cable are computed for point-source  
280 representations of the three major recent ruptures along the Vanuatu subduction zone (Fig. 6). A  
281 15-s low-pass filter has been applied to approximately account for <sup>the</sup>temporal finiteness of the  
282 ruptures. The arrival times vary with distance from the source to the observing point. Peak ground  
283 motions of about 0.2 m are associated with the large Rayleigh wave and Love wave packets on the

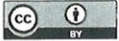

284 vertical and transverse components, respectively. The signals include all body wave arrivals. The  
285 initial P wave arrives at about 75-120 s after the origin time, when real-time analysis of ground  
286 shaking detected at the cable could commence. With a distribution of 4 three-component sensors  
287 along the cable, if on-scale recordings are obtained, rapid array processing could determine the  
288 azimuth of approach, and initial ground motion amplitudes can be used for magnitude estimation.  
289 Surface wave analysis of the larger signals is viable within 150 to 380 s of the earthquake origin  
290 time, if low frequency signals are recorded. With tsunami arrivals also varying with <sup>the</sup> source  
291 distance, <sup>a</sup> rapid tsunami potential assessment could be commenced using the Tamtam cable  
292 observations along with regional and global network observations.

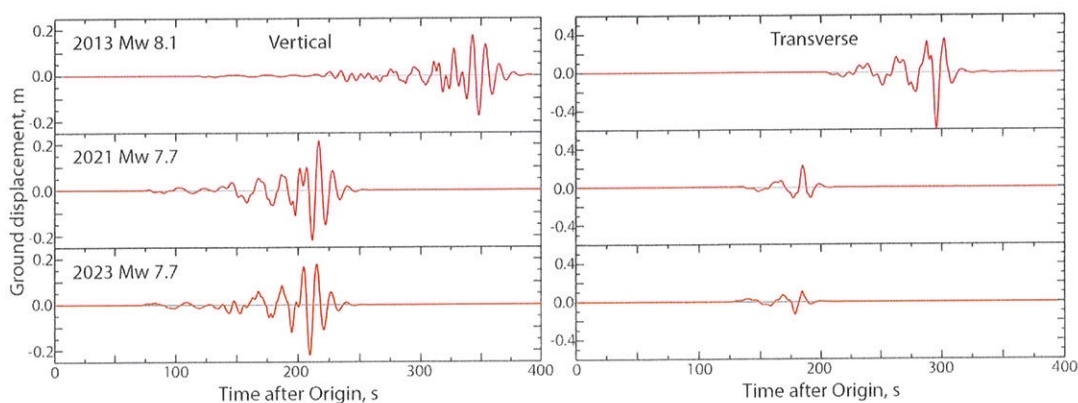

293  
294 **Figure 6.** Synthetic ground displacement time series at the target location of SMART sensor 2  
295 from three recent major earthquakes in the Vanuatu subduction zone shown in Fig. 2a-c.

### 296 3.2 UNESCO scenarios

297 The UNESCO  $M_W$  8.8 maximum earthquake scenario and its five  $M_W$  8.33 subevents  
298 complement the historical events to provide more complete coverage of the parameter space,  
299 especially along the most critical southern segment adjacent to population centers. Fig. 7 shows  
300 the tsunami wave amplitude along the Vanuatu subduction zone for the six scenarios. The initial  
301 wave of the thrust-faulting events is characterized by sea-surface uplift across the margin slope  
302 reaching 3.7 m near the trench. Subevent A at the northern end of the segment has the most severe  
303 impact <sup>on</sup> Vanuatu with waves reaching 8.5 m elevation at the east-facing shore of Efate Island,  
304 while subevents to the south are more critical to the Loyalty Islands with a maximum elevation of  
305 9.3 m at Maré Island (Fig. 7). For the combined  $M_W$  8.8 scenario, the arc curvature focuses the  
306 energy toward the southern Vanuatu Islands with nearshore amplification to 11.5 m elevation at

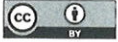

307 Tanna Island. The computed water elevation reaches 12.7 and 11.9 m at Lifou Island and the main  
308 island of New Caledonia. Since these values are surface elevations at the shore, resolvable by the  
309 0.5 arcmin (0.9 km) grid, runup heights might be larger or smaller depending on the coastal terrain.

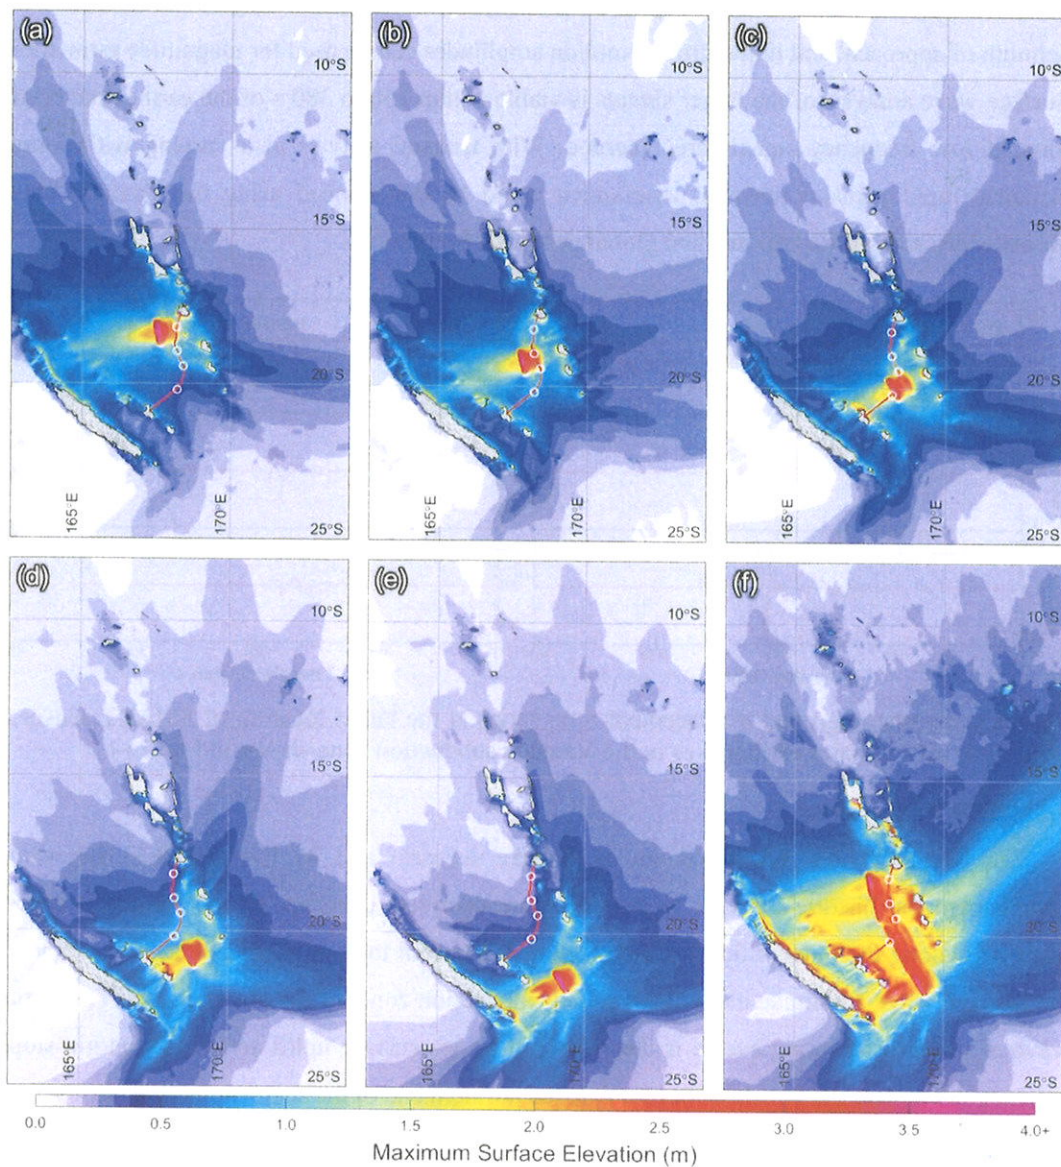

**Figure 7.** Computed wave amplitude of tsunamis generated by UNESCO earthquake scenarios in Figure 2d. (a)  $M_W$  8.33 A earthquake. (b)  $M_W$  8.33 B earthquake. (c)  $M_W$  8.33 C earthquake. (d)  $M_W$  8.33 D earthquake. (e)  $M_W$  8.33 E earthquake. (f)  $M_W$  8.8 combined maximum earthquake scenario. Red line and circles denote planned locations of the SMART cable and sensors.

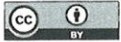

315 At least one SMART sensor will be located within the tsunami source regions of subevents A  
316 through C as well as the combined event with immediate signature of the initial sea surface uplift.  
317 An analysis of the model data shows travel times of 11 and 18 min for the tsunamis sourced from  
318 subevents D and E to reach the nearest sensor. Fig. 8 shows the computed waveforms and spectra  
319 at sensor 2 from the five subevents and the combined scenario for illustration. The sea surface rises  
320 to 2.5 m during the rupture of subevent B directly beneath the sensor, and with only minor energy  
321 trapping or resonance over the margin slope, the oscillation subsides rapidly through radiation.  
322 Even with rapid wave attenuation outside the source region, the sensor registers direct tsunami  
323 signals with less than 1 m amplitude for the other subevents. The combined event has initial wave  
324 amplitude similar to subevent B, but the much larger rupture length results in stronger codas due  
325 to waves arriving sequentially from the five subevents along the segment. The wave spectra for all  
326 six scenarios show strong bimodal, island and basin-scale excitations with peaks closely aligned  
327 with the oscillation modes deduced from the 2013 Santa Cruz Island event (Fig. 4).

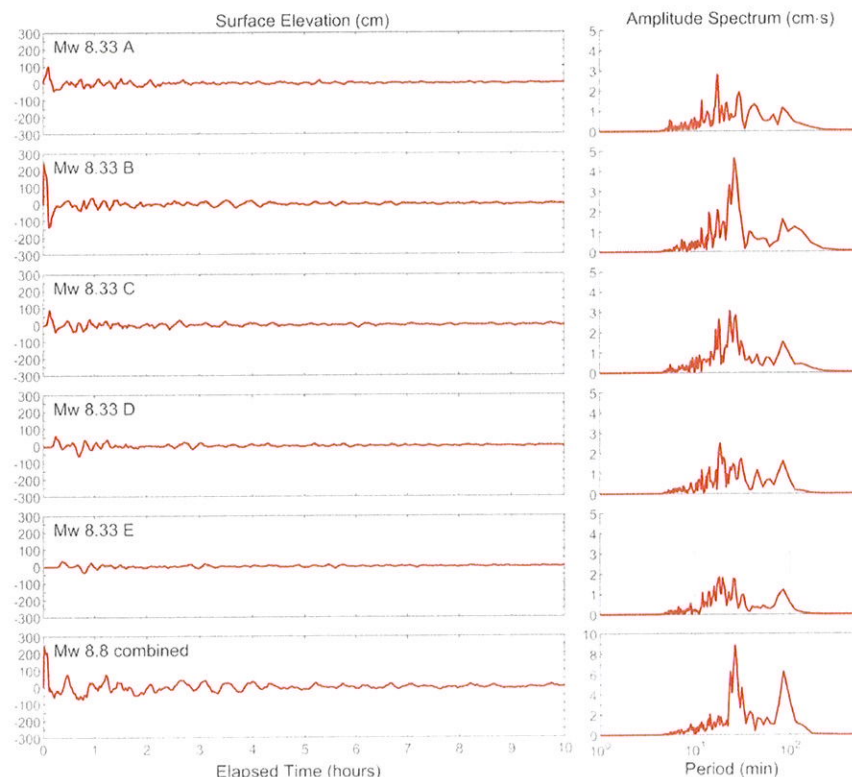

328  
329 **Figure 8.** Synthetic tsunami time series and spectral at the target location of SMART sensor 2 for  
330 the UNESCO earthquake scenarios shown in Fig. 2d.

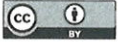

331 The seismic waves at the sensor 2 location are computed for the individual  $M_W$  8.33 subevents  
332 and the  $M_W$  8.8 combined faulting. All scenarios involve 10 m slip with moment tensor point  
333 sources at subevent centers and synchronous rupture of the entire segment for simplicity. Fig. 9  
334 shows the subevent signals comprising complete seismic ground motions, as well as static  
335 displacements. A low-pass filter with a 15 s corner has been applied to approximately account for  
336 the expected smoothing over the subevent space-time extent. Ground motions are shown for the  
337 vertical and transverse components and the time variations between arrivals indicate the distance  
338 from subevent centers to the sensor. The strongest seismic waves are produced by subevent B  
339 directly beneath the sensor with peak vertical and transverse transient displacements reaching 7 m  
340 as well as a static transverse displacement of  $\sim 1$  m after passage of the large surface waves.

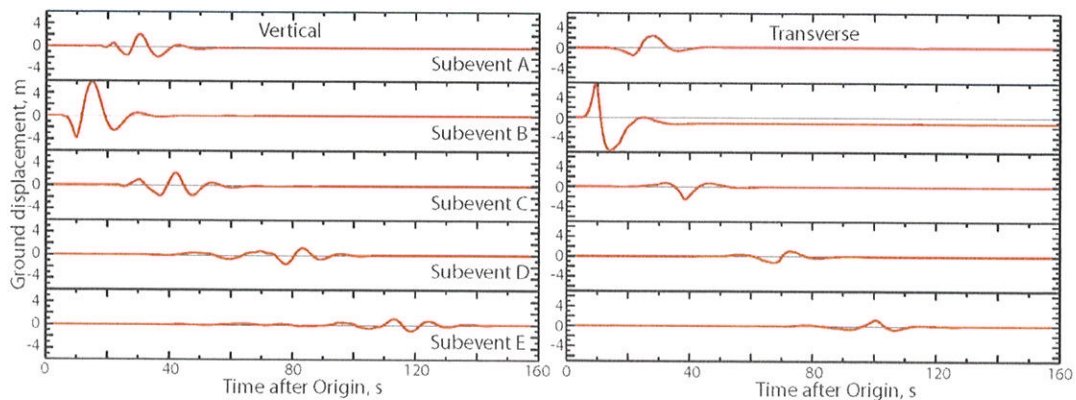

341  
342 **Figure 9.** Synthetic ground displacement time series at the target location of SMART sensor 2 for  
343 the UNESCO  $M_W$  8.33 earthquake scenarios A-E in Fig. 2d. A point-source at the center of each  
344 subfault is used for the calculations, and the displacements are low-pass filtered at 15 s period to  
345 account for slip duration over the subevent. Vertical and transverse (orthogonal to the great-circle  
346 connecting the source and sensor locations) ground displacements are shown.

347 The composite, long duration displacement for the  $M_W$  8.8 earthquake scenario is shown in  
348 Fig. 10. Since the subevents are assumed to rupture at the same time, their arrivals are delayed by  
349 propagation distance alone. The composite ground motions are expressed in terms of the vertical,  
350 north-south, and east-west components because the transverse component changes with each  
351 subevent location. A 15-s low-pass filter is again applied to approximately account for finiteness  
352 of the individual subevents. The sequence of discrete subevent pulses would be smeared out for a  
353 true continuous rupture, but the heterogeneous coupling expected along the subduction zone would  
354 likely involve correspondingly complex localized failures. The peak ground motion is about 6 m

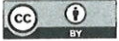

355 on the vertical and 7.5 m on the horizontal components along with appreciable static displacements  
356 due to the sensor location in the rupture zone.

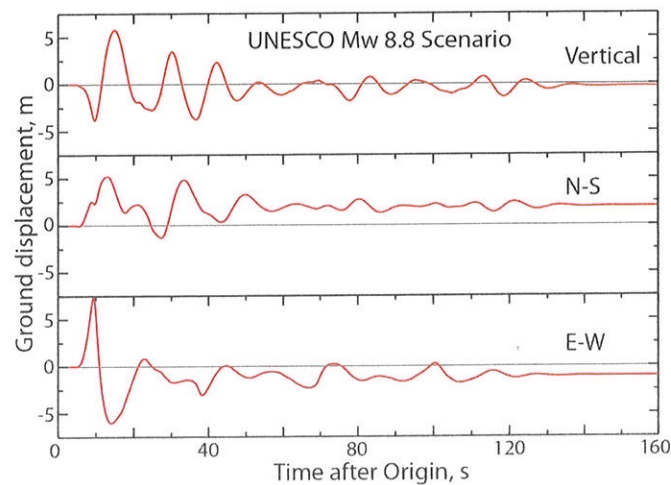

357  
358 **Figure 10.** Synthetic ground displacement time series at the target location of SMART sensor 2  
359 for the UNESCO  $M_W$  8.8 earthquake scenario in Fig. 2d. For simplicity, the 5 subevents are  
360 assumed to rupture synchronously, and the summed displacements are shown for the vertical,  
361 north-south, and east-west components of motion due to the changing geometry relative to the  
362 target location. A low pass filter at 15 s has been applied.

#### 363 4. Discussion and Conclusions

364 Large earthquakes occur along the entire Vanuatu subduction zone exposing many islands in the  
365 region to strong ground shaking and tsunami wave impact. Prior studies have systematically  
366 examined the hazards and developed fault models for recent major earthquakes and maximum  
367 events. These fault models form a basis to develop a plausible range of seismic and tsunami  
368 waveforms expected at the Tamtam SMART cable. The results provide a reference for hazard  
369 assessment, system and data integration, and emergency management.

##### 370 4.1 Earthquake and tsunami hazards

371 There have been 18 shallow ( $< 70$  km deep)  $M_W$  7.5+ earthquakes recorded in the Vanuatu  
372 subduction zone since 1900 (Cleveland et al., 2014; UNESCO-IOC, 2025). The UNESCO  
373 maximum scenario of  $M_W$  8.8 provides an upper-bound estimate of potential ground motions and  
374 tsunami impacts, but a far-smaller, more frequent major event in the southern segment can still  
375 devastate local communities in Vanuatu and New Caledonia. For example, the tsunami generated  
376 by the 1875  $M_W$  8.1-8.2 earthquake produced sediment deposits reaching 10 m elevation on the

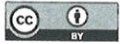

377 northeastern coast of Lifou Island, New Caledonia (Paris et al., 2023). The impact is comparable  
378 to the UNESCO subevents of  $M_W$  8.33 with computed sea-surface elevation reaching 8.5 and 9.3  
379 m at the shore of Efate Island and Maré Island in Vanuatu and New Caledonia. A recent 17  
380 December 2024  $M_W$  7.3 earthquake located 24 km west of Port Vila took 14 lives and injured 265,  
381 producing extensive damage in the capital of Vanuatu and long-term impacts on the tourism  
382 industry (World Bank, 2025). This event was 54 km deep within the subducting slab, but still  
383 produced a 25 cm tsunami. The depth and proximity of such an event to the island leaves little  
384 warning times for seismic or tsunami wave arrivals either with or without the Tamtam cable.

385 A major event from the northern or Matthew-Hunter segment, such as the 2013  $M_W$  8.0 and  
386 2021 and 2023  $M_W$  7.7 ruptures, also pose earthquake and tsunami hazards in Vanuatu and New  
387 Caledonia. The resulting tsunami arrives at the cable locations within an hour after the earthquake  
388 allowing limited time to respond if deemed destructive. Hazardous ocean conditions can be long  
389 lasting due to amplification and trapping of tsunami energy along island chains (Cheung et al.,  
390 2013). The resulting surges might damage ships and disrupt harbor operations despite having  
391 minor inundation risks. The limited number of regional seismic and geodetic sensors in operation  
392 hampers earthquake and tsunami warning capabilities along the entire subduction zone. The  
393 deployment of continuous monitoring along the Tamtam cable may contribute substantially to  
394 regional event detection and rapid assessment, particularly along the southern Vanuatu subduction  
395 zone.

#### 396 **4.2 Sensor system and data**

397 The seismic, pressure, and temperature sensors are installed inside the repeater housing or in  
398 separate modules of submarine telecommunication cables in the case of Tamtam. The broadband  
399 seismic sensors and optional accelerometers will be provided by Nanometrics  
400 (<https://nanometrics.ca>), and the temperature and pressure sensors will be supplied by RBR  
401 (<https://rbr-global.com>). The fabrication of sensor modules will be integrated into the cable  
402 manufacturing process by Alcatel Submarine Networks (ASN) through its Climate Change Nodes  
403 initiative. The collected data from the Tamtam SMART cable will be provided via ASN's Climate  
404 Change Portal for low-latency distribution to hazards monitoring agencies, such as the Vanuatu  
405 Meteorological and Geohazards Department (VMGD), Oceania Regional Seismic Network  
406 (ORSNET), and for long-term storage and dissemination for further analysis and climate research  
407 via Ifremer (French Research Institute for Exploitation of the Sea).

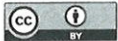

408 With tsunami waves arriving well after seismic waves, <sup>a</sup> rapid tsunami potential assessment  
409 could be commenced using the cable seismic observations along with regional and global land-  
410 based seismic network records. The spectral analysis has shown <sup>the</sup> recorded tsunami signals from  
411 sensors placed outside insular shelves have minor effects from resonance oscillations to provide  
412 general indications of potential impact and confirm inferences from seismic observations. Caution  
413 must be exercised for earthquake sources near the sensors. Large dynamic ground displacement  
414 might interfere with <sup>the</sup> operations of motion sensors laid on sediments. Lacking specific knowledge  
415 of the short-period ground displacements and the associated ground velocities and accelerations,  
416 we do not attempt to predict the actual recording fidelity of the Tamtam sensors, but after  
417 deployment, ground motion models can quickly be developed for the paths around the stations.  
418 Also not considered in this study is seismic noise in water level records that might mask <sup>the</sup> initial  
419 tsunami arrivals as commonly seen in bottom pressure data from DART stations near <sup>the</sup> earthquake  
420 sources (e.g., Bai et al., 2022, 2023). Additional QA/QC and post-processing are warranted as part  
421 of automated data analysis (e.g., An et al., 2017).

#### 422 4.3 Emergency management

423 Vanuatu is an island nation in the Southwest Pacific with an 800-900 km long archipelago of  
424 83 islands. The Vanuatu Meteorology and Geohazards Department (VMGD) is the government  
425 institute with the mandate to monitor meteorological and geological hazards, including volcanoes,  
426 earthquakes, and tsunamis, and provide early warning updates to the public. VMGD has an  
427 established geological monitoring network consisting of 15 plus seismic monitoring stations  
428 scattered along the six provinces of Vanuatu. Broadband sensors and established telemetry  
429 transmission to the VMGD data center enables near real time <sup>detection of</sup> seismic event ~~detection~~. The  
430 installation of tide gauges near the coastline of some islands assists with tsunami monitoring.  
431 However, the detection range is localized <sup>s</sup> to Vanuatu region and does not extend regionally or to  
432 the subduction zone.

433 The National Disaster Management Office (NDMO) is responsible for the response and  
434 recovery <sup>from</sup> to any disaster and activation of the National Emergency Operations Center with the  
435 advice from VMGD. Having a well-established hierarchy of groups down to province and  
436 community levels allow <sup>for</sup> coordinated pre-disaster awareness and outreach efforts and transfer of  
437 response and recovery efforts to the government and partners post disaster. The effectiveness of  
438 preparedness and mitigation measures developed <sup>are</sup> is a result of <sup>VMGD'S</sup> ~~the~~ availability of the real-time

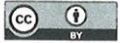

439 seismic and historical data ~~possessed by VMGD~~. The latter is now augmented here by synthetic  
440 seismic and tsunami data from three recent major earthquakes and tsunamis as well as the  
441 UNESCO-IOC maximum scenario along with its subevents for hazard assessment and long-term  
442 planning.

443 The deployment of the Tamtam SMART cable and integration of its real-time data into  
444 VMGD's monitoring system will greatly enhance the current early warning system. The Vanuatu  
445 subduction zone has so far been lacking direct observation since there has never been monitoring  
446 equipment installed in the area. The seismic, temperature and pressure data that will be made  
447 available by the four proposed ASN Climate Change Nodes will feed additional information to the  
448 current system providing earthquake detection parameters and tsunami threat analysis in and  
449 around the subduction zone. Acquiring such data will support preparedness and mitigation efforts  
450 developed by NDMO, resulting in a well informed and prepared country. The benefits will extend  
451 to the southwest Pacific and will be of great interest to the research community as well.

452 *Code availability.* The NEOWAVE code for tsunami modeling may be requested from the  
453 corresponding author for academic research. The SYNGINE seismic wave simulator is available  
454 online (<https://ds.iris.edu/ds/products/ondemandsynthetics/>).

455 *Data availability.* The digital elevation model used in this study is available at GEBCO  
456 ([https://www.gebco.net/data\\_and\\_products/gridded\\_bathymetry\\_data/](https://www.gebco.net/data_and_products/gridded_bathymetry_data/)).

457 *Authorship contribution.* KC: Conceptualization, Methodology, Investigation, Project  
458 Administration, Writing - original draft, review and editing. YY: Methodology, Investigation,  
459 Software, Formal analysis, Data curation, Visualization, Writing - review and editing. TL:  
460 Methodology, Investigation, Software, Formal analysis, Data curation, Visualization, Writing -  
461 original draft review and editing. MF: Writing - original draft, review and editing. JN: Writing -  
462 original draft, review and editing. BH: Writing - review and editing.

463 *Declaration of competing interest.* The authors declare that they have no known competing  
464 financial interests or personal relationships that could have appeared to influence the work reported  
465 in this paper.

466 *Acknowledgements.* SOEST Contribution No. XXXXX.

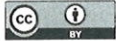

467 *Financial support.* The Gordon and Betty Moore Foundation funded this study through Grant No.  
468 GBMF10787 to the University of Hawaii and subawards to Subsea Data Systems and Vanuatu  
469 Meteorology and Geo-hazards Department. T. Lay was supported by the National Science  
470 Foundation under grant number EAR-1802364.

#### 471 **References**

- 472 An, C., Cai, C., Zheng, Y., Meng, L., Liu, P.: Theoretical solution and applications of ocean bottom  
473 pressure induced by seismic seafloor motion. *Geophys. Res. Lett.*, 44, 10,272-10,281,  
474 doi:10.1002/2017GL075137, 2017.
- 475 Aranguiz, R., Catalán, P.A., Cecioni, C., Bellotti, G., Henriquez, P., and González, J. Tsunami  
476 resonance and spatial pattern of natural oscillation modes with multiple resonators. *J. Geophys.*  
477 *Res.: Oceans*, 124, 7797-7816, doi:10.1029/2019JC015206, 2019.
- 478 Bai, Y., Liu, C., Lay, T., Cheung, K.F., and Ye, L.: Optimizing a model of coseismic rupture for  
479 the 22 July 2020 Mw 7.8 Simeonof earthquake by exploiting acute sensitivity of tsunami  
480 excitation across the shelf break. *J. Geophys. Res.: Solid Earth*, 127, e2022JB024484,  
481 doi:10.1029/2022JB024484, 2022.
- 482 Bai, Y., Liu, C., Lay, T., Cheung, K.F., and Yamazaki, Y.: Fast and slow intraplate ruptures during  
483 the 19 October 2020 magnitude 7.6 Shumagin earthquake. *Nat. Comm.*, 14(1), 2015,  
484 doi:10.1038/s41467-023-37731-2, 2023.
- 485 Bai, Y., Yamazaki, Y., and Cheung, K.F.: Intercomparison of hydrostatic and nonhydrostatic  
486 modeling for tsunami inundation mapping. *Phys. Fluids*, 35(7), 077111,  
487 doi:10.1063/5.0152104, 2023b.
- 488 Cheung, K.F., Bai, Y., and Yamazaki, Y.: Surges around the Hawaiian Islands from the 2011  
489 Tohoku tsunami. *J. Geophys. Res. Oceans*, 118(10), 5703-5719, doi:10.1002/jgrc.20413,  
490 2013.
- 491 Cleveland, K.M., Ammon, C.J., and Lay, T.: Large earthquake processes in the northern Vanuatu  
492 subduction zone. *J. Geophys. Res.: Solid Earth*, 119, 8866-8883, doi:10.1002/2014JB011289,  
493 2014.
- 494 Davies, G. and Griffin, J.: The 2018 Australian Probabilistic Tsunami Hazard Assessment. Record  
495 2018/41, Geoscience Australia, Canberra, <https://doi.org/10.11636/Record.2018.041>, 2018.

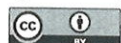

- 496 Dziewonski, A.M. and Anderson, D.L.: Preliminary reference Earth model. *Phys. Earth Planet.*  
497 *Int.*, 25, 297-356, doi:10.1016/0031-9201(81)90046-7, 1981
- 498 Fry, B., McCurrach, S.-J., Gledhill, K., Power, W., Williams, M., Angove, M., Arcas, D. and  
499 Moore, C.: Sensor network warns of stealth tsunamis. *Eos*, 101, doi:10.1029/2020EO144274,  
500 2020.
- 501 Heidarzadeh, M., Harada, T., Satake, K., Ishibe, T., and Gusman, A.R.: Comparative study of two  
502 tsunamigenic earthquakes in the Solomon Islands: 2015  $M_w$  7.0 normal-fault and 2013 Santa  
503 Cruz  $M_w$  8.0 megathrust earthquakes. *Geophys. Res. Lett.*, 43(9), 4340-4349,  
504 doi:10.1002/2016GL068601, 2016.
- 505 Howe et al.: SMART cables for observing the global ocean: science and implementation. *Front.*  
506 *Earth Sci.*, 6, 424, doi:10.3389/fmars.2019.00424, 2019.
- 507 Howe et al.: SMART subsea cables for observing the earth and ocean, mitigating environmental  
508 hazards, and supporting the blue economy. *Front. Earth Sci.*, 9, 775544,  
509 doi:10.3389/feart.2021.775544, 2022.
- 510 Lay, T., Ye, L., Kanamori, H., Yamazaki, Y., Cheung, K.F., and Ammon, C. J.: The February 6,  
511 2013  $M_w$  8.0 Santa Cruz Islands earthquake and tsunami. *Tectonophysics*, 608, 1109–1121,  
512 doi:10.1016/j.tecto.2013.07.001, 2013.
- 513 Li, L. and Cheung, K.F.: Numerical dispersion in non-hydrostatic modeling of long-wave  
514 propagation. *Ocean Modell.*, 138, 68-87, doi:10.1016/j.ocemod.2019.05.002, 2019.
- 515 Ioualalen, M., Pelletier, B., and Solis Gordillo, G.: Investigating the March 28<sup>th</sup> 1875 and the  
516 September 20<sup>th</sup> 1920 earthquakes/tsunamis of the Southern Vanuatu arc, offshore Loyalty  
517 Islands, New Caledonia. *Tectonophysics*, 709, 20–38, doi:j.tecto.2017.05.006, 2017.
- 518 Okada, Y.: Surface deformation due to shear and tensile faults in a half-space. *Bull. Seismol. Soc.*  
519 *Am.*, 75(4), 1125-1154, doi:10.1785/BSSA0750041135, 1985.
- 520 Paris, R, Pelletier, B., Roger, J., Wassmer, P., and Sabatier, P.: Sedimentary evidence of tsunamis  
521 in New Caledonia, southwest Pacific. *Mar. Geol.*, 463, 107116,  
522 doi:10.1016/j.margeo.2023.107116, 2023.
- 523 Robert, W.H., Yamazaki, Y., Cheung, K.F., and Lay, T.: Tsunami variability for the 2021  
524 megathrust and 2023 outer rise  $M_w$  7.7 earthquake southeast of the Loyalty Islands. *J. Geophys.*  
525 *Res.: Oceans*, 130, e2024JC021880, doi:10.1029/2024JC021880, 2025.

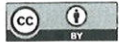

- 526 Roger, J. and Pelletier, B.: A brief history of tsunamis in the Vanuatu Arc. *Nat. Haz. Earth Syst.*  
527 *Sci.*, 24(10), 3461-3478 doi:10.5194/nhess-24-3461-2024, 2024.
- 528 Roger, J.H.J., Pelletier, B., Duphil, M., Lefèvre, J., Aucan, J., Lebellegard, P., Thomas, B.  
529 Bachelier, D., and Varillon, D.: The  $M_W$  7.5 Tadine (Maré, Loyalty Islands) earthquake and  
530 related tsunami of 5 December 2018: seismotectonic context and numerical modeling. *Nat.*  
531 *Haz. Earth Syst. Sci.*, 21(11), 3489-3508, doi:10.5194/nhess-21-3489-2021, 2021.
- 532 Tanioka, Y. and Satake, K.: Tsunami generation by horizontal displacement of ocean bottom.  
533 *Geophys. Res. Lett.*, 23(8), 861-864, doi:10.1029/96GL00736, 1996.
- 534 UNESCO-IOC: Expert Meeting on Tsunami Sources, Hazards, Risk and Uncertainties Associated  
535 with the Vanuatu, Solomon and New Britain Subduction Zones, Port Vila, Vanuatu, 14-17  
536 May 2024. Workshop Report 315, UNESCO, Paris, France.  
537 <https://unesdoc.unesco.org/ark:/48223/pf0000392442.locale=en>, 2025.
- 538 World Bank: Global Rapid Post-Disaster Damage Estimation Report: The December 17, 2024  $M_W$   
539 7.3 Earthquake in Port Vila, Vanuatu. Global Facility for Disaster Reduction and Recovery,  
540 World Bank, Washington, DC, <http://hdl.handle.net/10986/42820>, 2025.
- 541 Yamazaki, Y., Bai, Y., Goo, L.L., Cheung, K.F., and Lay, T.: Nonhydrostatic modeling of  
542 tsunamis from earthquake rupture to coastal impacts. *J. Hydraul. Eng.*, 149(9), 04023033,  
543 doi:10.1061/JHEND8.HYENG-133, 2023.
- 544 Yamazaki, Y., Cheung, K.F., and Kowalik, Z.: Depth-integrated, non-hydrostatic model with grid  
545 nesting for tsunami generation, propagation, and run-up. *Int. J. Numer. Meth. Fluids*, 67, 2081-  
546 2107, doi:10.1002/flid.2485, 2011.
- 547 Yamazaki, Y., Kowalik, Z., and Cheung, K.F.: Depth-integrated, non-hydrostatic model for wave  
548 breaking and run-up. *Int. J. Num. Meth. Fluids*, 61, 473-497, doi:10.1002/flid.1952, 2009.
- 549 Ye, L., Gong, W., Lay, T., Kanamori, H., and Chen, X.: Shallow megathrust rupture during the 10  
550 February 2021  $M_W$  7.7 Southeast Loyalty Islands Earthquake Sequence. *Seism. Rec.*, 1(3),  
551 154–163, doi:10.1785/0320210035, 2021.
